# Supplementary material for: Comparison of the effects of use, protection, improper renovation and removal of asbestos products on the example of typical old office buildings
Source: Research Square preprint supplement (doi:10.21203/rs.3.rs-2483920/v1), 2023-02-02
Supplement: Supplementary file 1 [file 14ec5ddb5f81654bfd622799.docx]

**Appendix D**

**The potential effects of intermittent asbestos airborne on users in refurbished buildings**

Considering the scope of professional exposure of construction workers and maintenance staff (Removing Building Roofing, Remove Flooring Products, Replacing Ceiling Tiles, Repair Boilers etc.), peoples exposure was determined in the range of 10,000 - 280,000 f/m3 [25]. Average building airborne concentrations of fibre > 5 um Long, registered for USA and United Kingdom buildings were in the range of 50 - 400 f/m3. From this, it was concluded [25] that asbestos in buildings does not pose a threat to users and its risk is specified as "Risk at Low Exposure. One of the opinions presented here provides 4-40 and 6-60 premature deaths due to cancer to a million persons if children will be exposed to asbestos in schools at levels 200 - 2000 f/m3 and 500 - 5000 f/m3 [26]. The dependence of mesothelioma incidence on environmental asbestos contamination has been well confirmed by numerous researchers [ 27, 28,29] For comparison of health effects of permanent, elevated exposition to asbestos its worth to consider the following example. The concentration of asbestos airborne in the atmospheric air in Poland in the years 2004-2010 was about 480 f/m3. In the area contaminated with industrial ACM production before 1990, it was 6,000 - 19,000 f/m3. In the period 2002 – 2008, the average concentration of asbestos fibres in the atmospheric air in the contaminated area of industrial area was about 1500 f/m3. It resulted locally in an excess number of deaths from mesothelioma between 1999 and 2013 (407 cases per million). This indicator was 80 times higher than the national average. In 2016, the incidence of mesothelioma in this area was still higher than the national average (60 times) [29].

Nowadays, the EU plans to tighten the limit value of workers' exposure by lowering the PEL to 0.01 F/ccm. It is worth noting that in the described cases of accidental damage to ACM products during use or renovation, asbestos dust with a similar concentration of asbestos fibres, on level 2000 – 3000 f/m3 persists for months or years in exploited rooms.

The condition of these rooms is not controlled for asbestos airborne because the rooms do not contain asbestos (after it has been removed) and have been put into use.
