# Supplementary material for: Comparison of the effects of use, protection, improper renovation and removal of asbestos products on the example of typical old office buildings
Source: Research Square preprint supplement (doi:10.21203/rs.3.rs-2483920/v1), 2023-02-02
Supplement: Supplementary file 3 [file a480bc0d6d5604be581c94a9.docx]

**Appendix C1**

**
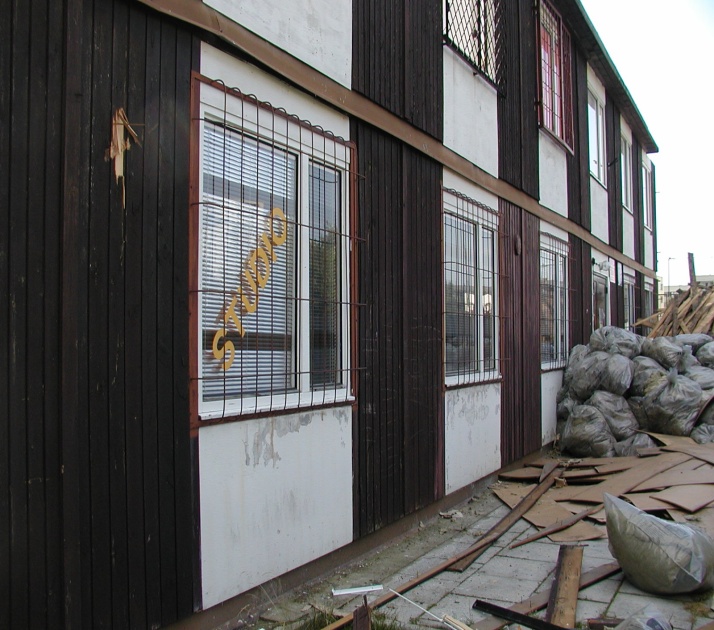
 a
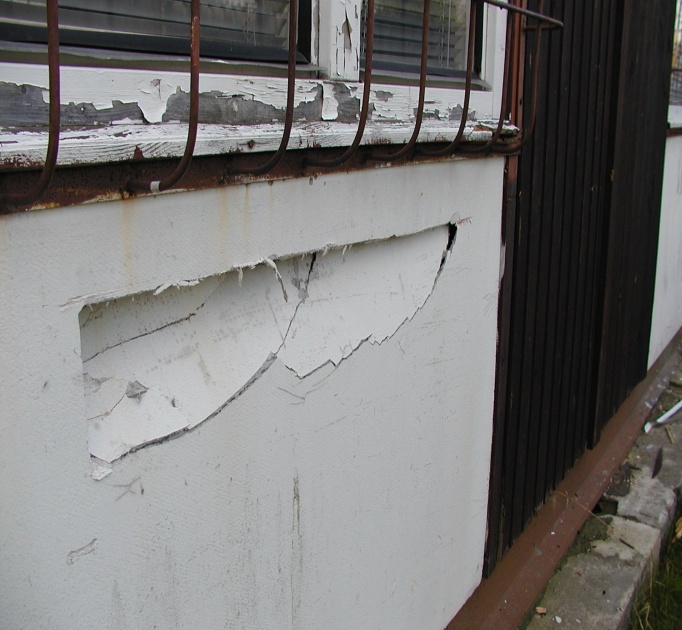
 b**

**
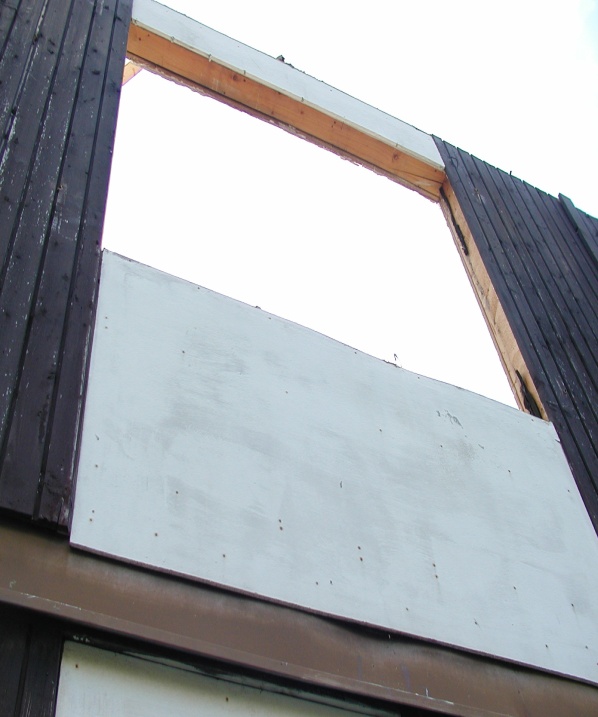
 c
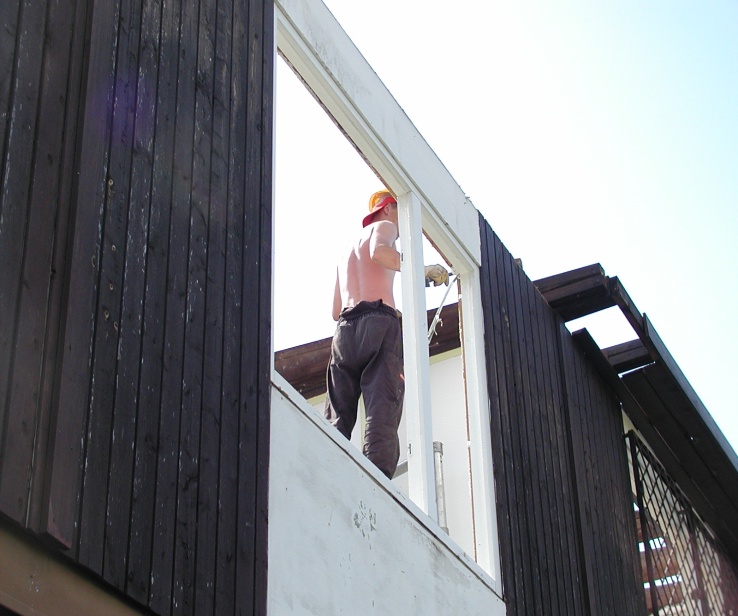
 d**

Demolition of the MOA building. The general appearance of the work carried out.

a) No separation of waste, mixing asbestos with other waste, without its tight closure.

b) Breakage of the ACM boards constituting the internal and external sheathing of the building's external and partition sandwich walls.

c) A fragment of an external wall on the 1st floor.

d) View after removing the roof. 14th day of work.
