# Supplementary material for: Comparison of the effects of use, protection, improper renovation and removal of asbestos products on the example of typical old office buildings
Source: Research Square preprint supplement (doi:10.21203/rs.3.rs-2483920/v1), 2023-02-02
Supplement: Supplementary file 6 [file e287552a5320790029702cb4.docx]

**Terms and conditions of sampling**

The author began testing building no. 1 after the first step in its renovation process. This continued for several years. During this time, the renovation of the exterior walls and façade was completed. The façade was insulated by adding a layer of Styrofoam and plaster. Other advanced renovation works inside the building followed in succession. In the course of these, only simple tasks were performed, such as sanding the walls, rubbing off old paint and painting and replacing windows and doors. In some rooms, the renovation had been completed weeks, months or even three years earlier. In other rooms, the renovation was incomplete and suspended. In still other rooms, the renovation had yet to start. After the author discovered the presence of asbestos, work was completely interrupted. Following a short break where work was suspended for approximately two weeks, the author did some research. Some of the rooms were suspended for use for ~20 days and intensively ventilated. Others were normally used. Tests in those rooms were repeated after airing. The characteristics of the building and damage to its ACM before and after renovation are shown in photographs (**Appendices B1 and B2**).

The research of “BERLIN” no. 2 was carried out in 2002, before and after the renovation of 2005. Tests were continued in 2006, 2015 and 2022.

Studies of buildings type “BERLIN” nos. 3–5 were carried out after an average of 30–50 years of use, similar to buildings type “LIPSK”.

Studies of buildings “LIPSK” nos. 7–11 and “MOA” no. 12, related to the short-term impact of large pollutants in buildings, were carried out over the duration of construction works. These studies were carried out in the years 2000 – 2020.
